# Supplementary material for: Arabidopsis HEAT SHOCK TRANSCRIPTION FACTORA1b regulates multiple developmental genes under benign and stress conditions
Source: PubMed Central journal article supplement (PMC5961379; doi:10.1093/jxb/ery142), 2018-04-25
Supplement: ery142_suppl_supplementary_figures_s1-s6_tables_s1-s2.pdf [file ery142_suppl_supplementary_figures_s1-s6_tables_s1-s2.pdf]

## Supplementary Data

### **Arabidopsis *Heat Shock Transcription FactorA1b* regulates multiple developmental genes under growth and stress conditions**

Waleed S. Albihlal<sup>1</sup>, Igor Chernukhin<sup>2</sup>, Thomas Blein<sup>3</sup>, Ramona Persad, Irabonosi Obomighie, Martin Crespi<sup>3</sup>, Ulrike Bechtold and Philip M. Mullineaux\*

#### **Supplementary Methodology**

##### **Chromatin immunoprecipitation followed by high throughput sequencing Ch.**

This protocol was optimized to perform ChIP-seq on Arabidopsis leaves only. Further optimization may be required to conduct this experiment on other tissue.

This protocol is adapted and modified from Saleh et al. (2008) from where buffer and solution formulations can be found. The protocol adapted from this published procedure was as follows:

- 1- 2 g of 5-week-old Arabidopsis leaves were harvested and placed in a 100 ml beaker.
- 2- 40 ml of crosslinking buffer was added to each sample followed by applying a vacuum for 10 minutes at room temperature.
- 3- The crosslinking reaction was quenched by adding 2.5 ml of 2 M Glycine (final concentration 125 mM), mixed well and followed by applying a vacuum for an additional 5 minutes at room temperature.
- 4- Plant tissue was washed three times with sterile water; water was removed from the plant material by blotting the plant tissue between paper towels then leaves were snap frozen in liquid nitrogen.
- 5- Frozen plant tissue was ground to very fine powder using a dry-ice pre-chilled mortar and pestle.
- 6- Ground samples were placed in pre-chilled 50 ml falcon tubes and kept on dry ice.
- 7- Ground plant material was re-suspended in 25 ml of cold nuclei isolation buffer, vortexed briefly to mix and kept on ice for 15 to 20 minutes with repeated vortexing every 5 minutes until complete homogenization was achieved and no visible clumps remain.
- 8- The homogenized slurry was filtered through four layers of cheesecloth (Fisher scientific, S04824). A funnel was placed on a new 50 ml falcon tube then the four layers of cheesecloth were placed on the funnel. Homogenized slurry was poured on the cheesecloth then cheesecloths were manually squeezed without allowing any solid material to pass into the collection tube.
- 9- Filtrates were centrifuged at 4500 x g for 30 minutes at 4°C until a tight white pellet (nuclei) with an overlay of chlorophyll was visible.

- 10-The supernatant was discarded and pellet (nuclei) were re-suspended in 2 ml of cold nuclei lysis buffer.
- 11-Samples were divided into four aliquots of 500  $\mu$ l each in 1.5 ml eppendorf tubes.
- 12-Chromatin was sheared to an average fragment size of  $\sim$ 250bp (100bp to 350bp) by sonication. The sonicator used was a Bioruptor diagenode standard. The sonication conditions were 4 cycles, each cycle was 10 minutes divided into 30 seconds of sonication and 30 seconds pause at the highest power setting. Samples were kept on ice for at least 2 minutes between each cycle to avoid heating and foaming of the samples.
- 13-Samples were centrifuged at 13000 x g for 10 minutes at 4°C to pellet debris.
- 14-The supernatants were transferred into new 1.5 ml microfuge tube.
- 15-Sonicated and non-sonicated chromatin were reverse-crosslinked (see step 26) and DNA was extracted using phenol/chloroform method (see steps 27 – 36) followed by subjecting them to electrophoresis side by side through a 1.5% (w/v) agarose gel to compare the size distribution of sonicated and non-sonicated chromatin.
- 16-300  $\mu$ l aliquot was transferred into new 1.5 ml tube and diluted with 700  $\mu$ l of lysis buffer.
- 17-5  $\mu$ l of the Anti-YFP antibody (Abcam, ab290) was added to the diluted chromatin, making a final dilution of 1:200 and incubated for 3 hours at 4°C with gentle rotation.
- 18-60  $\mu$ l of pre-equilibrated and pre-blocked Protein A-Sepharose CL4-B beads (Sigma-Aldrich, P3391) were added sample followed by further incubation for 2 hours at 4°C with gentle rotation.
- 19-Samples were centrifuged at 2000 x g for 5 minutes at 4°C. The beads-antibody-chromatin complexes were recovered as pellets.
- 20-The beads were washed three times with 1 ml of low salt buffer for 5 minutes with gentle rotation. Then three times with 1 ml high salt buffer and finally once with lithium chloride wash buffer.
- 21-Immune-complexes were eluted from beads by adding 250  $\mu$ l of freshly prepared elution buffer (see **reagent formulations** below) followed by incubation at room temperature for 15 minutes with gentle rotation.
- 22-Samples were centrifuged at 2000 x g for 5 minutes at 4°C and supernatant was transferred into new 2 ml microfuge tube.
- 23-The elution step 21 was repeated by adding another 250  $\mu$ l of freshly prepared elution buffer to the beads followed by incubation at room temperature for 30 minutes with gentle rotation.
- 24-Samples were centrifuged at 2000 x g for 5 minutes at 4°C and the supernatant was collected.
- 25-The two eluates (from steps 21 and 23) were combined to a total eluate of 500  $\mu$ l.
- 26-20  $\mu$ l of 5 M NaCl was added to each sample followed by a 12 hour incubation at 65°C to reverse the crosslinking.

- 27-The following solutions were added to samples the following day: 10  $\mu\text{l}$  of 0.5 M EDTA, 20  $\mu\text{l}$  of 1 M Tris-HCl, and 1  $\mu\text{l}$  of proteinase K (20  $\text{mg ml}^{-1}$ ; ThermoFisher, EO0491) followed by incubation for 1.5 h at 42°C to digest the proteins.
- 28-1 volume of water saturated phenol pH 7.9 (FisherScientific, BP1750I-400) was added to samples followed by vortexing for 10 seconds.
- 29-Samples were centrifuged at 13000 x g for 15 minutes at 4°C and the upper phase (~500  $\mu\text{l}$ ) was transferred into a new 2 ml microfuge tube.
- 30-200  $\mu\text{l}$  of water-saturated chloroform was added to samples followed by vortexing for 10 seconds.
- 31-Samples were centrifuged at 13000 x g for 15 minutes at 4°C.
- 32-The upper phase of each sample was transferred into 2 ml microfuge tubes.
- 33-The following was added to the transferred samples: 2.5 volume of absolute ethanol, 0.1 volume of 3 M sodium acetate pH 5.2, 3  $\mu\text{l}$  of glycogen (20  $\text{mg ml}^{-1}$ ) followed by incubation for 2 hours at -80°C.
- 34-Samples were centrifuged at 13000 x g for 30 minutes at 4°C.
- 35-Supernatants were discarded and pellets washed with 500  $\mu\text{l}$  of 75% (v/v) ethanol. Pellets were air dried at room temperature for 7 minutes.
- 36-Pellets were then dissolve in 40  $\mu\text{l}$  of sterile water.
- 37-The control samples were wild type plants treated exactly the same way as the test samples.
- 38-Sequencing libraries were constructed using TruSeq ChIP library preparation kit (Illumina, IP-202-1012) at Earlham institute (formerly known as The Genome Analysis Centre, Norwich, UK).
- 39-Samples were multiplexed then sequenced by the Earlham Institute on Illumina HiSeq2000 platform with the following metrics: 100 bp paired-end and a minimum depth of 10 million reads per library.

### **Notes:**

- 1- The choice of antibody is very crucial of for the success of ChIP. The antibody must be a ChIP or co-IP grade. Also, polyclonal antibodies are preferred over monoclonal antibodies for ChIP experiments. If no ChIP or co-IP antibodies are available then it is recommended to test the antibodies on crosslinked materials by performing IP followed by western blot.
- 2- The choice of beads is also critical for the success of any immunoprecipitation experiment. It is very important to know whether Protein A or Protein G has the highest affinity for the antibody used in the experiment.
- 3- Crosslinking is a key step for the success of ChIP. Adjustments have to be done if more than 2 g of plant material is to be used. The volumes of the crosslinking buffer and the glycine solution have to be increased accordingly. Cramming too much plant material in 40 ml of crosslinking buffer will result in a very weak or no crosslinking.

### **Reagent formulations:**

**1- Crosslinking buffer:**

0.4 M sucrose, 10 mM Tris-HCl pH 8.0, 1 mM EDTA, 1% formaldehyde, and 1 mM PMSF.

**Note:** Use high quality formaldehyde and make fresh buffer before each experiment. The presence of sucrose in the crosslinking buffer increases the efficiency of DNA-protein crosslinking. The protease inhibitor (PMSF) should be added directly before using the buffer as PMSF has a very short life in aqueous solutions.

**2- Nuclei Isolation buffer:**

0.25 M sucrose, 15 mM PIPES pH 6.8, 5 mM MgCl<sub>2</sub>, 60 mM KCl, 15 mM NaCl, 1 mM CaCl<sub>2</sub>, 0.9% Triton X100, 1 mM PMSF, 2 µg ml<sup>-1</sup> Pepstatin A, and 2 µg ml<sup>-1</sup> Aprotinin.

**Note:** Prepare fresh, filter sterilize and keep at 4°C. The protease inhibitors PMSF, Pepstatin A and Aprotinin should be added directly before using the buffer.

**3- Nuclei Lysis buffer:**

50 mM HEPES pH 7.5, 150 mM NaCl, 1 mM EDTA, 0.1% SDS, 0.1% sodium deoxycholate, 1% Triton X100, 1 mM PMSF, 1 µg ml<sup>-1</sup> Pepstatin A, and 1 µg ml<sup>-1</sup> Aprotinin.

**Note:** Prepare fresh, filter sterilize and keep at 4°C. The protease inhibitors PMSF, Pepstatin A and Aprotinin must be added immediately before using the buffer.

**4- Low Salt wash buffer:**

150 mM NaCl, 20 mM Tris-HCl pH 8.0, 2 mM EDTA, 0.2% SDS, and 0.5% Triton X100, 1 mM PMSF, 2 µg ml<sup>-1</sup> Pepstatin A, and 2 µg ml<sup>-1</sup> Aprotinin.

**5- High Salt wash buffer:**

500 mM NaCl, 20 mM Tris-HCl pH 8.0, 2 mM EDTA, 0.2% SDS, and 0.5% Triton X100, 1 mM PMSF, 2 µg ml<sup>-1</sup> Pepstatin A, and 2 µg ml<sup>-1</sup> Aprotinin.

**6- Lithium Chloride wash buffer:**

0.25 M lithium chloride, 1% sodium deoxycholate, 10 mM Tris-HCl pH 8.0, 1 mM EDTA, 1% NP-40 1 mM PMSF, 2 µg ml<sup>-1</sup> Pepstatin A, and 2 µg ml<sup>-1</sup> Aprotinin.

**7- TE buffer:**

1 mM EDTA and 10 mM Tris-HCl pH 8.0 1 mM PMSF, 2 µg ml<sup>-1</sup> Pepstatin A, and 2 µg ml<sup>-1</sup> Aprotinin.

**8- Elution buffer:**

0.5% SDS and 0.1 M sodium bicarbonate (NaHCO<sub>3</sub>).

**Note:** prepare fresh and keep at room temperature to avoid SDS precipitation.

**9- PMSF stock solution:**

Prepare a 100 mM stock solution in isopropanol or absolute ethanol. Aliquot and store at -20°C.

**10- Pepstatin A stock solution:**

Prepare a  $1 \text{ mg ml}^{-1}$  stock solution in methanol. Aliquot and store at  $-20^{\circ}\text{C}$ .

### **11-Aprotinin stock solution:**

Prepare a  $1 \text{ mg ml}^{-1}$  stock solution in sterile deionized water, aliquot and store at  $-20^{\circ}\text{C}$ .

### **12-Preparing Protein (A/G) sepharose beads (for CHIP-SEQ)**

a- Swelling and storage:

- i- Resuspend protein (A/G) sepharose beads (250 mg) in 20 ml of sterile water for an overnight at  $4^{\circ}\text{C}$ . This will result in 1 ml swollen bead volume.
- ii- Wash beads three time with 10 ml sterile water.
- iii- Resuspend protein (A/G) sepharose beads in storage buffer (10 mM Tris-HCl pH 8.0, 1 mM EDTA, and 0.1% sodium azide).
- iv- Make 50% slurry with storage buffer. Add enough volume of storage buffer so that the final volume of beads plus the storage buffer is twice the volume of beads alone. For example, if the sediment volume of beads is 1 ml then add enough storage buffer so that the total volume of beads plus storage buffer is 2 ml.

b- Pre-blocking beads:

- i- Resuspend beads in 200  $\mu\text{l}$  of pre-blocking buffer and mix with gentle rotation for 4 hours or an overnight at  $4^{\circ}\text{C}$ .
- ii- Centrifuge the beads at  $2000 \times g$  for 5 minutes at  $4^{\circ}\text{C}$  and discard the supernatant.
- iii- Pre-equilibrate beads with lysis buffer.
- iv- Pre-blocking buffer:  
10  $\mu\text{l}$  glycogen ( $20 \text{ mg ml}^{-1}$ ), 10  $\mu\text{l}$  BSA ( $20 \text{ mg ml}^{-1}$ ), and 20  $\mu\text{l}$  yeast t-RNA ( $10 \text{ mg ml}^{-1}$ ) in 1 ml of lysis buffer plus protease inhibitors.

### **Notes:**

- Pre-blocked beads can be used within 5 days.
- For long term storage, resuspend beads in storage buffer.

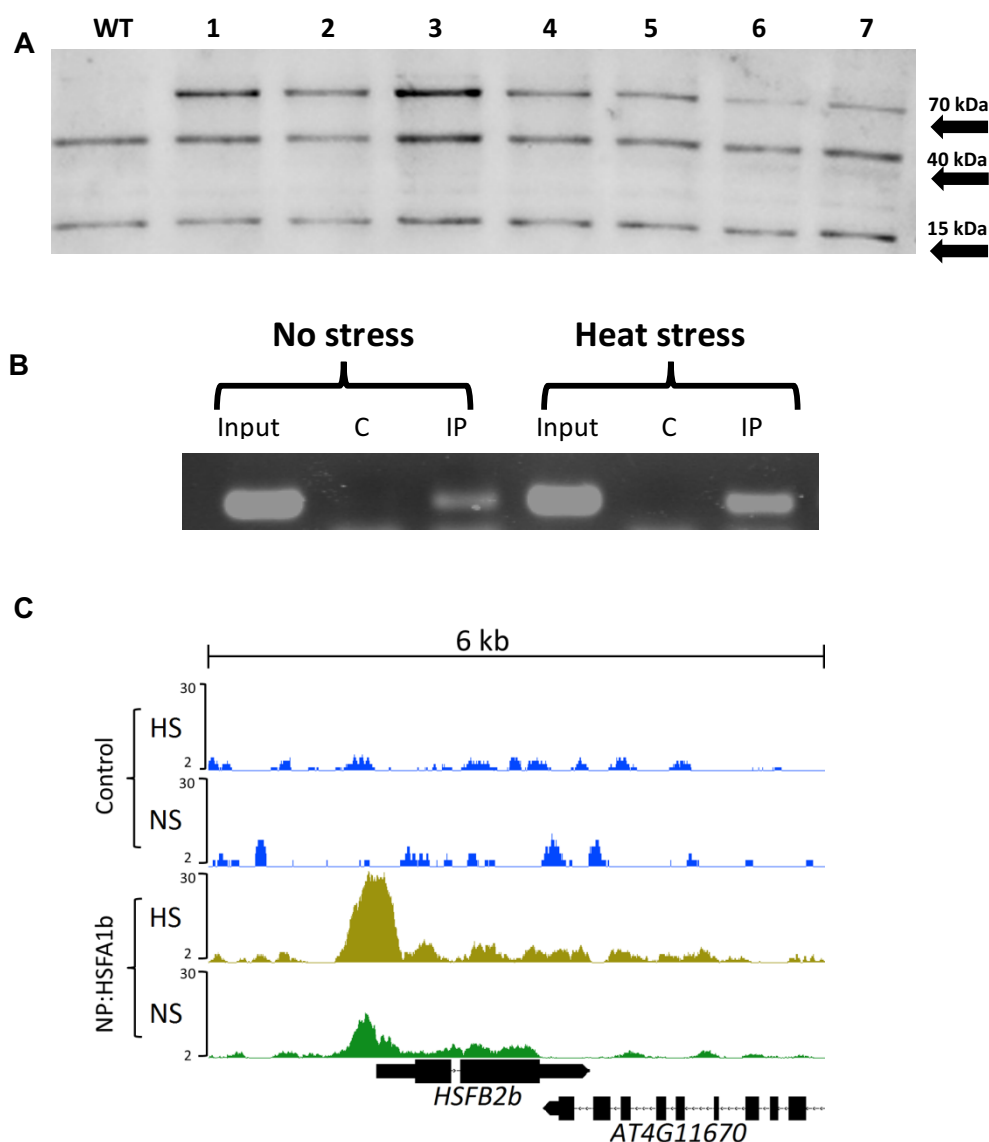

**Figure S1 (A)** Immunoblot comparing the levels of HSFA1b-eYFP extracted from seven NP:HSFA1b independent T3 transgenic lines. HSFA1b-eYFP was probed with the same GFP antibody used later in ChIP-PCR and ChIP-seq experiments. The HSFA1b-YFP fusion is the top band on the image. **(B)** PCR amplification of ChIP *HSFB2b* promoter fragments from transgenic line NP:HSFA1b\_6 showing that this line is suitable for ChIP experiments under NS and HS. Input DNA is the positive control for the PCR reaction, C is a GFP antibody control precipitation with Col-0 (WT) and IP the NP:HSFA1b\_6 sample that was immune-precipitated with GFP antibody. **(C)** Genome browser view of normalized NP:HSFA1b NS and NP:HSFA1b HS ChIP-seq tags on the promoter of *HSFB2b* confirming the ChIP-PCR result. Control is as in panel B

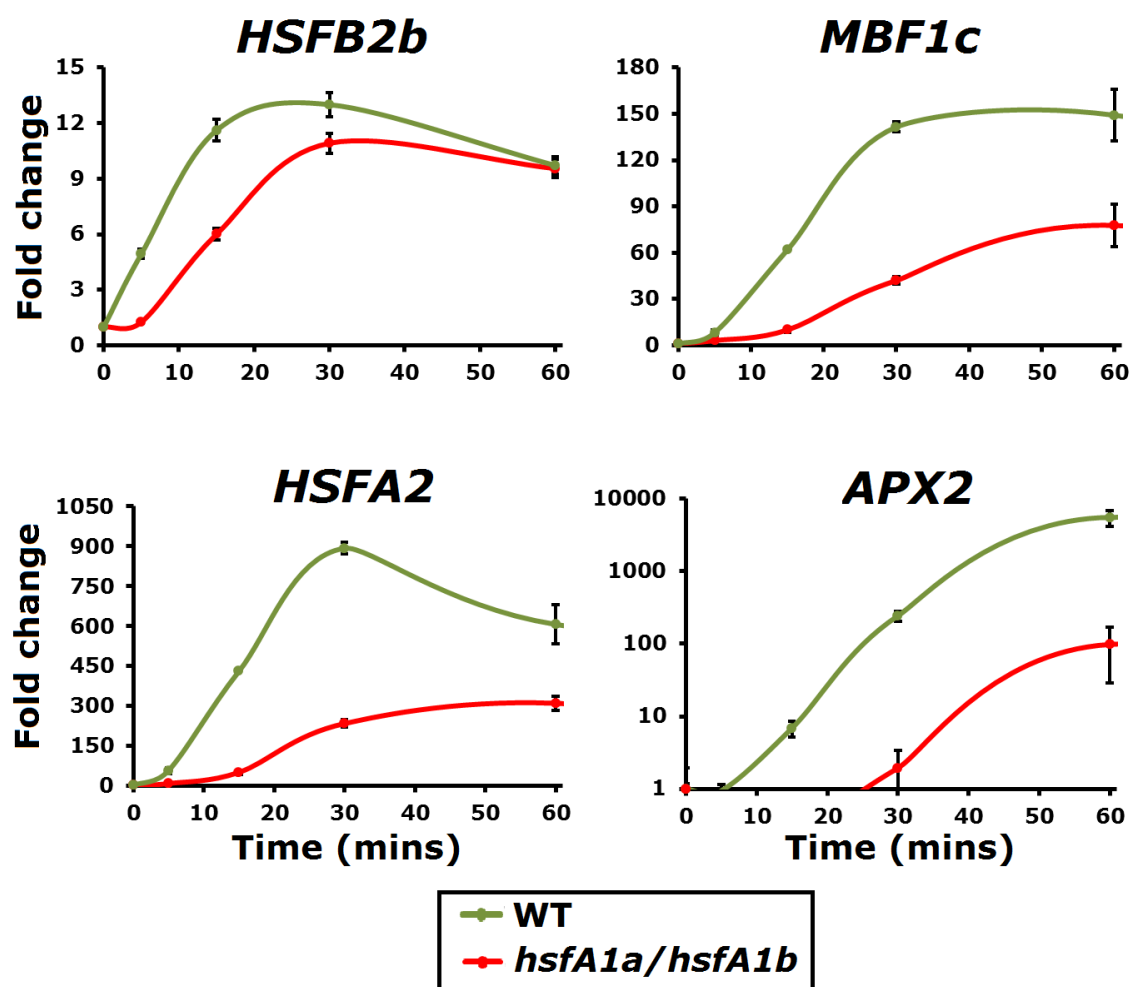

**Figure S2.** Time-series qRT-PCR results comparing the activation time of four heat-responsive genes, *HSFB2b*, *MBF1c*, *HSFA2*, and *APX2* between wild type (WT; *Ws-0*) and *hsfA1a/hsfA1b* plants.

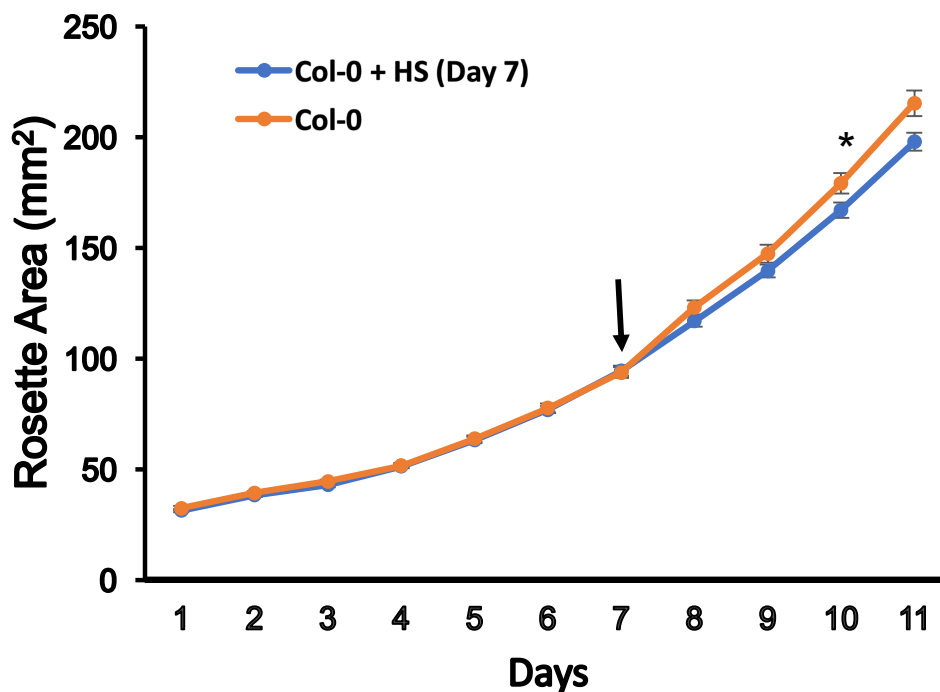

**Figure S3.** Impact of heat stress on *Arabidopsis* on the increase in rosette area. Rosette area of *Arabidopsis* seedlings were germinated and grown in 8h day: 16h night conditions on soil-filled square plastic pots (3.5cmx3.5cmx5.5cm) for 2 weeks and then their rosette areas measured daily for 11 days using chlorophyll fluorescence imaging (see Methods). **A)** 2 sets of wildtype plants grown without stress (**Col-0**) and heat stress on day 7 (arrowed) for 2 hours at 37°C (**Col-0 + HS (Day 7)**).



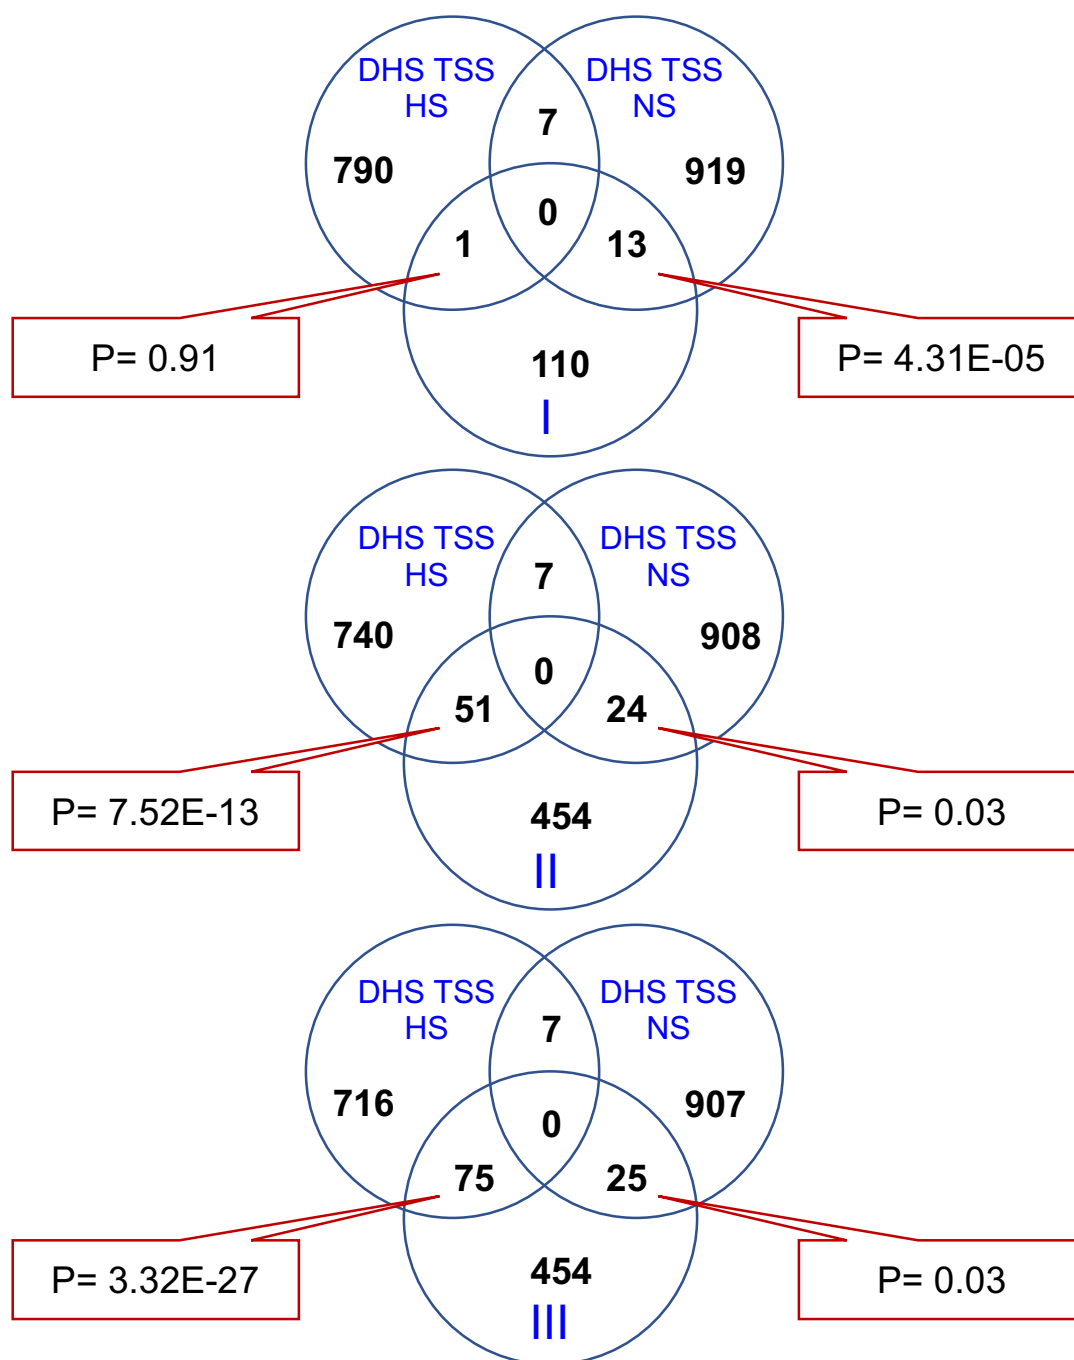

**Figure S4.** Venn diagrams showing the degree of overlap between Groups I-III HSFA1b target genes and the nearest Transcription Start Site (TSS) loci in genome-mapped DNase1 hypersensitive sites (DHS) from Sullivan et al., 2014 which used control and HS seedlings. The P values in the callout banners are calculated from a Hypergeometric Distribution Test.

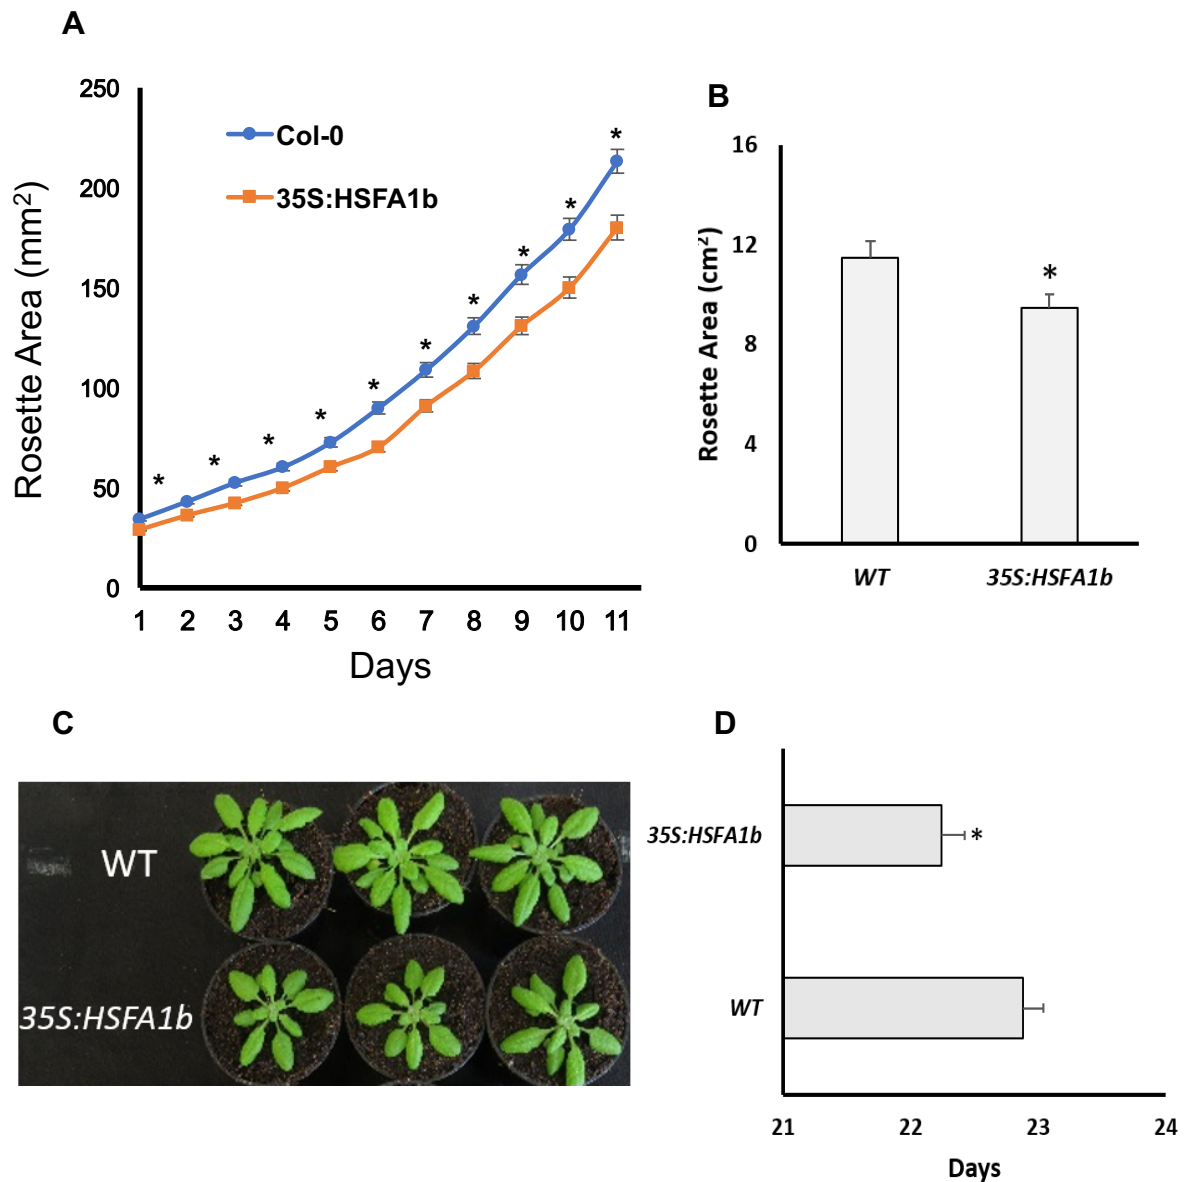

**Figure S5. Phenotype of 35S:HSFA1b plants compared to Col-0.** **A)** Rosette area expansion of 15 – 25 days post-germination plants (n=12; single experiment) from days 1-11 of measurements. Areas were determined by imaging the chlorophyll fluorescence parameters  $F_0$  see Methods. **B)** Total rosette area; of 5-week-old plants. **C)** The photograph shows typical examples of rosettes from Col-0 and 35S:HSFA1b plants under stated growth conditions at 4 weeks. **D)** Flowering time i.e. number of days needed to attain a flowering bolt height  $\geq 1$ cm). To induce flowering in a controlled way, 4-week-old plants grown in 8h day: 16h night were transferred to 16h day: 8h night. Asterisks means  $p < 0.05$  (Students t-test; n= 12 plants)

| HSFA1b DEGs bound by BZIP28 | gene symbols | HSFA1b bound | HSFA1b DEGs bound by BZIP28 | gene symbols | HSFA1b bound |
|-----------------------------|--------------|--------------|-----------------------------|--------------|--------------|
| AT1G04980                   | PDIL2-2      | yes          | AT3G55240                   | AT3G55240    | no           |
| AT1G07670                   | ECA4         | yes          | AT3G62610                   | MYB11        | no           |
| AT1G14360                   | UTR3         | yes          | AT4G08230                   | AT4G08230    | no           |
| AT1G21750                   | PDIL1-1      | yes          | AT4G16660                   | AT4G16660    | yes          |
| AT1G27350                   | AT1G27350    | yes          | AT4G21810                   | DER2.1       | no           |
| AT1G72280                   | ERO1         | yes          | AT4G24920                   | AT4G24920    | no           |
| AT1G77510                   | PDIL1-2      | no           | AT4G29330                   | DER1         | yes          |
| AT2G02810                   | UTR1         | yes          | AT4G34620                   | SSR16        | no           |
| AT2G32920                   | PDIL2-3      | yes          | AT4G35780                   | STY17        | no           |
| AT2G34420                   | LHB1B2       | yes          | AT5G13100                   | AT5G13100    | no           |
| AT2G34430                   | LHB1B1       | no           | AT5G17760                   | AT5G17760    | no           |
| AT2G34620                   | AT2G34620    | no           | AT5G28540                   | BIP1         | yes          |
| AT3G02470                   | SAMDC        | no           | AT5G45630                   | AT5G45630    | yes          |
| AT3G08970                   | ATERDJ3A     | no           | AT5G64510                   | TIN1         | yes          |
| AT3G54960                   | PDIL1-3      | no           |                             |              |              |

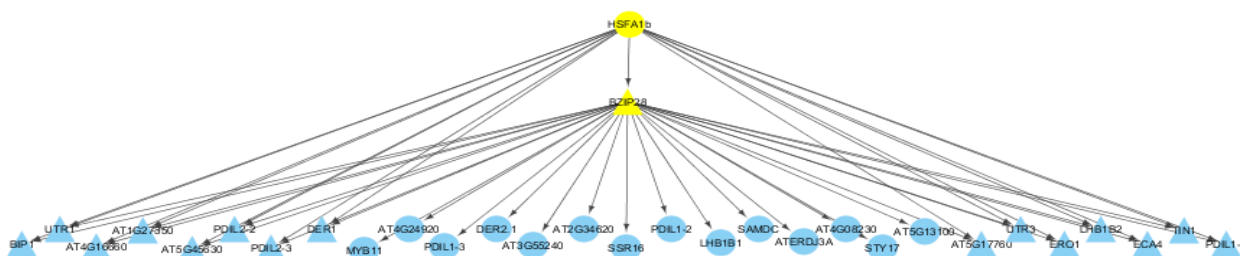

**Figure S6** Hierarchical network showing interaction between HSF1b and BZIP28 from ChIP-seq data (Data S1; Zhang et al 2017) and co-regulated genes for these interactions determined from overlapping RNA-seq data sets (Data S3; Zhang et al 2017). The interactions are summarised in the accompanying table. The network was generated in Cytoscape from a compatible network file generated in Excel.

**Table S1 Experimentally confirmed developmental genes bound by HSFA1b.**

Those words in black letters are differentially expressed in WT plants subjected to HS. Those in bold are differentially expressed in 35S:HSFA1b plants under NS compared with WT plants under NS and/or HS. Those in blue are bound by HSFA1b but not differentially expressed significantly under HS or in 35S:HSFA1b plants.

| <i>Locus Identifier</i> | <i>Primary Gene Symbol</i>                                 | <i>Reference</i>                                                                                                                   |
|-------------------------|------------------------------------------------------------|------------------------------------------------------------------------------------------------------------------------------------|
| AT1G02090               | FUSCA 5 (FUS5)                                             | Karniol B, Malec P, Chamovitz DA. Plant Cell. 1999;11: 839. doi:10.1105/tpc.11.5.839                                               |
| AT1G09080               | <b>BINDING PROTEIN 3 (BIP3)</b>                            | Maruyama D, Endo T, Nishikawa S. Plant Signal Behav. 2015;2324: 2. doi:10.1080/15592324.2015.1035853                               |
| AT1G13245               | ROTUNDIFOLIA LIKE 17 (RTFL17)                              | Valdivia ER, Chevalier D, Sampedro J, Taylor I, Niederhuth CE, Walker JC. J Exp Bot. 2012;63: 1405. doi:10.1093/jxb/err378         |
| AT1G14360               | <b>UDP-GALACTOSE TRANSPORTER 3 (UTR3)</b>                  | Reyes F, León G, Donoso M, Brandizzi F, Weber APM, Orellana A. Plant J. 2010;61: 423. doi:10.1111/j.1365-313X.2009.04066.x         |
| AT1G14740               | TITANIA 1 (TTA1)                                           | Lin TF, Saiga S, Abe M, Laux T. PLoS One. 2016;11: 1. doi:10.1371/journal.pone.0155657                                             |
| AT1G18330               | REVIELLE 7 (RVE7)                                          | Kuno N, Moller S, Shinomura T, Xu X, Chua N-H, Furuya M. Plant Cell. 2003;15: 2476. doi:10.1105/tpc.014217                         |
| AT1G19180               | <b>JASMONATE-ZIM-DOMAIN PROTEIN 1 (JAZ1)</b>               | Song S, Qi T, Fan M, Zhang X, Gao H, Huang H, et al. PLoS Genet. 2013;9: e1003653. doi:10.1371/journal.pgen.1003653                |
| AT1G20780               | <b>SENESCENCE-ASSOCIATED E3 UBIQUITIN LIGASE 1 (SAUL1)</b> | Raab S, Drechsel G, Zarepour M, Hartung W, Koshiba T, Bittner F, et al. Plant J. 2009;59: 39. doi:10.1111/j.1365-313X.2009.03846.x |
| AT1G21750               | <b>PDI-LIKE 1-1 (PDIL1-1)</b>                              | Kumar MN, Hsieh Y, Verslues PE. Proc Natl Acad Sci. 2015;112: 10545. doi:10.1073/pnas.1510140112                                   |

|                  |                                              |                                                                                                                                                  |
|------------------|----------------------------------------------|--------------------------------------------------------------------------------------------------------------------------------------------------|
| <b>AT1G32640</b> | <b>MYC2</b>                                  | Valenzuela CE, Acevedo-Acevedo O, Miranda GS, Vergara-Barros P, Holuigue L, Figueroa CR, et al. J Exp Bot. 2016;67: 4209. doi:10.1093/jxb/erw202 |
| <b>AT1G33140</b> | <b>PIGGYBACK 2 (PGY2)</b>                    | Pinon V, EtcHELLS JP, ROSSIGNOL P, COLLIER S a, Arroyo JM, Martienssen R a, et al. Development. 2008;135: 1315. doi:10.1242/dev.016469           |
| AT1G34245        | EPIDERMAL PATTERNING FACTOR 2 (EPF2)         | Hunt L, Gray JE. Curr Biol. Elsevier Ltd; 2009;19: 864–869. doi:10.1016/j.cub.2009.03.069                                                        |
| AT1G48410        | ARGONAUTE 1 (AGO1)                           | Bohmert K, Camus I, Bellini C, Bouchez D, Caboche M, Banning C. EMBO J. 1998;17: 170. doi:10.1093/emboj/17.1.170                                 |
| <b>AT1G60190</b> | <b>PLANT U-BOX 19 (PUB19)</b>                | Moon J, Parry G, Estelle M. Plant Cell. 2004;16: 3181. doi:10.1105/tpc.104.161220.3182                                                           |
| <b>AT1G66400</b> | <b>CALMODULIN LIKE 23 (CML23)</b>            | Tsai, Y-C, Delk, NA, Chowdhury, NI, Braam J. Plant Signal Behav. 2007;2: 446. doi:10.4161/psb.2.6.4695                                           |
| <b>AT1G67960</b> | <b>POLLEN DEFECTIVE IN GUIDANCE 1 (POD1)</b> | Li H-J, Xue Y, Jia D-J, Wang T, Hi D-Q, Liu J, et al. Plant Cell. 2011;23: 3288. doi:10.1105/tpc.111.088914                                      |
| AT1G69530        | EXPANSIN A1 (EXPA1)                          | Esmon CA, Tinsley AG, Ljung K, Sandberg G, Hearne LB, Liscum E A. Proc Natl Acad Sci. 2005;103: 236. doi:10.1073/pnas.050127103                  |
| <b>AT1G70060</b> | <b>SIN3-LIKE 4 (SNL4)</b>                    | Bowen AJ, Gonzalez D, Mullins JGL, Bhatt AM, Martinez A, Conlan RS. J Mol Biol. 2010;395: 937. doi:10.1016/j.jmb.2009.11.065                     |
| <b>AT1G70140</b> | <b>FORMIN 8 (FH8)</b>                        | Xue X, Guo C, Du F, Lu Q, Zhang C, Ren H. Mol Plant 2011;4: 264. doi:10.1093/mp/ssq085                                                           |
| AT1G78080        | RELATED TO AP2 4 (RAP2.4)                    | Iwase A, Harashima H, Ikeuchi M, Rymen B, Ohnuma M, Komaki S, et al. Plant Cell. 2016;29: tpc.00623.2016. doi:10.1105/tpc.16.00623               |
| AT1G80490        | TOPLESS-RELATED 1 (TPR1)                     | Oh E, Zhu J-Y, Ryu H, Hwang I, Wang Z-Y. Nat Commun. 2014;5: 4140. doi:10.1038/ncomms5140                                                        |

|           |                                                  |                                                                                                                                       |
|-----------|--------------------------------------------------|---------------------------------------------------------------------------------------------------------------------------------------|
| AT2G02760 | <b>UBIQUITING-CONJUGATING ENZYME 2 (UBC2)</b>    | Xu L, Ménard R, Berr A, Fuchs J, Cognat V, Meyer D, et al. <i>Plant J.</i> 2009;57: 279. doi:10.1111/j.1365-313X.2008.03684.x         |
| AT2G02810 | <b>UDP-GALACTOSE TRANSPORTER 1 (UTR1)</b>        | Reyes F, León G, Donoso M, Brandizzi F, Weber APM, Orellana A. <i>Plant J.</i> 2010;61: 423. doi:10.1111/j.1365-313X.2009.04066.x     |
| AT2G03120 | <b>SIGNAL PEPTIDE PEPTIDASE (SPP)</b>            | Han S, Green L, Schnell DJ. <i>Plant Physiol.</i> 2009;149: 1289. doi:10.1104/pp.108.130252                                           |
| AT2G04030 | <b>(CR88)</b>                                    | Feng J, Fan P, Jiang P, Lu S, Chen X, Li Y. <i>Physiol Plant.</i> 2014;150: 292. doi:10.1111/ppl.12083                                |
| AT2G14120 | <b>DYNAMIN RELATED PROTEIN (DRP3B)</b>           | Aung K, Hu J. <i>J Integr Plant Biol.</i> 2012;54: 921. doi:10.1111/j.1744-7909.2012.01174.x                                          |
| AT2G15790 | <b>SQUINT (SQN)</b>                              | Berardini TZ, Bollman K, Sun H, Poethig RS. <i>Science (80- ).</i> 2001;291: 2405. doi:10.1126/science.1057144                        |
| AT2G19580 | <b>TETRASPANIN 2 (TET2)</b>                      | Cnops G, Neyt P, Raes J, Petrarulo M, Nelissen H, Malenica N, et al. <i>Plant Cell.</i> 2006;18: 852. doi:10.1105/tpc.105.040568      |
| AT2G21660 | <b>GLYCINE-RICH RNA-BINDING PROTEIN 7 (GRP7)</b> | Xiao J, Li C, Xu S, Xing L, Xu Y, Chong K. <i>Plant Physiol.</i> 2015;169: 2102. doi:10.1104/pp.15.00801                              |
| AT2G23430 | <b>(ICK1)</b>                                    | Malinowski R, Kasprzewska A, Fleming AJ. <i>Plant J.</i> 2011;66: 941. doi:10.1111/j.1365-313X.2011.04559.x                           |
| AT2G28000 | <b>CHAPERONIN-60ALPHA (CPN60A)</b>               | Apuya NR, Yadegari R, Fischer RL, Harada JJ, Zimmerman JL, Goldberg RB. <i>Plant Physiol.</i> 2001;126: 717. doi:10.1104/pp.126.2.717 |
| AT2G36740 | <b>(SWC2)</b>                                    | Choi K, Park C, Lee J, Oh M, Noh B, Lee I. <i>Development.</i> 2007;134: 1931. doi:10.1242/dev.001891                                 |
| AT2G41940 | <b>ZINC FINGER PROTEIN 8 (ZFP8)</b>              | Zhou Z, An L, Sun L, Gan Y. <i>Plant Signal Behav.</i> 2012;7: 28. doi:10.4161/psb.7.1.18404134.                                      |
| AT2G42590 | <b>GENERAL REGULATORY FACTOR 9 (GRF9)</b>        | Mayfield JD, Paul AL, Ferl RJ. <i>J Exp Bot.</i> 2012;63: 3061. doi:10.1093/jxb/ers022                                                |

|                  |                                                                              |                                                                                                                           |
|------------------|------------------------------------------------------------------------------|---------------------------------------------------------------------------------------------------------------------------|
| <b>AT2G42620</b> | <b>MORE AXILLARY BRANCHES 2 (MAX2)</b>                                       | Wang L, Wang B, Jiang L, Liu X, Li X, Lu Z, et al. Plant Cell. 2015;27: 1. doi:10.1105/tpc.15.00605                       |
| <b>AT3G08590</b> | <b>2,3-BIPHOSPHOGLYCERATE-INDEPENDENT PHOSPHOGLYCERATE MUTASE 2 (iPGAM2)</b> | Zhao Z, Assmann SM. J Exp Bot. 2011;62: 5179. doi:10.1093/jxb/err223137.                                                  |
| <b>AT3G09840</b> | <b>CELL DIVISION CYCLE 48 (CDC48)</b>                                        | Copeland C, Woloshen V, Huang Y, Li X. Plant J. 2016;88: 294. doi:10.1111/tpj.13251                                       |
| <b>AT3G29030</b> | <b>EXPANSIN A5 (EXPA5)</b>                                                   | Bergonci T, Silva-Filho MC, Moura DS. Plant Signal Behav. 2014;9: e976146. doi:10.4161/15592324.2014.976146               |
| <b>AT3G44110</b> | <b>(J3)</b>                                                                  | Shen L, Yu H. Plant Signal Behav. 2011;6: 601. doi:10.4161/psb.6.4.15375                                                  |
| <b>AT3G50060</b> | <b>MYB DOMAIN PROTEIN 77 (MYB77)</b>                                         | Zhao Y, Xing L, Wang X, Hou Y-J, Gao J, Wang P, et al. Sci Signal. 2014;7: ra53-ra53. doi:10.1126/scisignal.2005051       |
| <b>AT3G51840</b> | <b>ACYL-COA OXIDASE 4 (ACX4)</b>                                             | Rylott EL, Rogers CA, Gilday AD, Edgell T, Larson TR, Graham IA. J Biol Chem. 2003;278: 21370. doi:10.1074/jbc.M300826200 |
| <b>AT3G54920</b> | <b>POWDERY MILDEW RESISTANT 6 (PMR6)</b>                                     | Vogel JP, Raab TK, Schiff C, Somerville SC. Plant Cell. 2002;14: 2095. doi:10.1105/tpc.003509                             |
| <b>AT3G59060</b> | <b>PHYTOCHROME INTERACTING FACTOR 3-LIKE 6 (PIL6)</b>                        | Pedmale U V., Huang SSC, Zander M, Cole BJ, Hetzel J, Ljung K, et al. Cell 2016;164: 233. doi:10.1016/j.cell.2015.12.018  |
| <b>AT3G63440</b> | <b>CYTOKININ OXIDASE/DEHYDROGENASE 6 (CKX6)</b>                              | Lall S, Nettleton D, DeCook R, Che P, Howell SH. Genetics. 2004;167:1892. doi:10.1534/genetics.103.025213                 |
| <b>AT4G00060</b> | <b>MATERNAL EFFECT EMBRYO ARREST 44 (MEE44)</b>                              | Pagnussat GC, Yu H-J, Ngo Q a, Rajani S, Mayalagu S, Johnson CS, et al. Development. 2005;132: 603. doi:10.1242/dev.01595 |
| <b>AT4G01250</b> | <b>WRKY22</b>                                                                | Zhou X, Jiang Y, Yu D. 2011;31: 303. doi:10.1007/s10059-011-0047-1                                                        |
| <b>AT4G02980</b> | <b>ENDOPLASMIC RETICULUM AUXIN BINDING PROTEIN 1 (ABP1)</b>                  | Grones P, Chen X, Simon S, Kaufmann WA, De Rycke R, Nodzycki T, et al. J Exp Bot. 2015;66: 5055. doi:10.1093/jxb/erv177   |

|           |                                                                    |                                                                                                                                                       |
|-----------|--------------------------------------------------------------------|-------------------------------------------------------------------------------------------------------------------------------------------------------|
| AT4G05420 | <b>DAMAGED DNA BINDING PROTEIN 1A (DDB1A)</b>                      | Bjerkan KN, Grini PE. <i>Plant Signal Behav.</i> 2013;2324: 1. doi:10.4161/psb.25347                                                                  |
| AT4G08920 | <b>CRYPTOCHROME 1 (CRY1)</b>                                       | Pedmale U V., Huang SSC, Zander M, Cole BJ, Hetzel J, Ljung K, et al. <i>Cell</i> 2016;164: 233. doi:10.1016/j.cell.2015.12.018                       |
| AT4G09510 | <b>CYTOSOLIC INVERTASE 2 (CINV2)</b>                               | Barratt DHP, Derbyshire P, Findlay K, Pike M, Wellner N, Lunn J, et al. <i>Proc Natl Acad Sci U S A.</i> 2009;106: 13124. doi:10.1073/pnas.0900689106 |
| AT4G11660 | <b>HSFB2b</b>                                                      | Kolmos E, Chow BY, Pruneda-Paz JL, Kay SA. <i>Proc Natl Acad Sci.</i> 2014;111: 16172. doi:10.1073/pnas.1418483111                                    |
| AT4G20260 | <b>PLASMA-MEMBRANE ASSOCIATED CATION-BINDING PROTEIN 1 (PCAP1)</b> | Li J, Wang X, Qin T, Zhang Y, Liu X, Sun J, et al. <i>Plant Cell.</i> 2011;23: 4427. doi:10.1105/tpc.111.092684                                       |
| AT4G22950 | <b>AGAMOUS-LIKE 19 (AGL19)</b>                                     | Kang MJ, Jin HS, Noh YS, Noh B. <i>New Phytol.</i> 2015;206: 281. doi:10.1111/nph.13161                                                               |
| AT4G24190 | <b>SHEPHERD (SHD)</b>                                              | Klein EM, Mascheroni L, Pompa A, Ragni L, Weimar T, Lilley KS, et al. <i>Plant J.</i> 2006;48: 673. doi:10.1111/j.1365-313X.2006.02904.x              |
| AT4G24280 | <b>CHLOROPLAST HEAT SHOCK PROTEIN 70-1 (cpHsc70-1)</b>             | Su P-H, Li H-M. <i>Plant Physiol.</i> 2008;146: 1241. doi:10.1104/pp.107.114496                                                                       |
| AT4G25520 | <b>SEUSS-LIKE 1 (SLK1)</b>                                         | Bao F, Azhakanandam S, Franks RG. <i>Plant Physiol.</i> 2010;152: 836. doi:10.1104/pp.109.146183                                                      |
| AT4G32410 | <b>CELLULOSE SYNTHASE 1 (CESA1)</b>                                | Chen S, Ehrhardt DW, Somerville CR. <i>Proc Natl Acad Sci.</i> 2010;107: 17193. doi:10.1073/pnas.1012348107                                           |
| AT4G34460 | <b>GTP BINDING PROTEIN BETA 1 (AGB1)</b>                           | Ishida T, Tabata R, Yamada M, Aida M, Mitsumasu K, Fujiwara M, et al. <i>EMBO Rep.</i> 2014;15: 1202. doi:10.15252/embr.201438660                     |
| AT5G02500 | <b>HEAT SHOCK COGNATE PROTEIN 70-1 (HSC70-1)</b>                   | Cazalé AC, Clément M, Chiarenza S, Roncato MA, Pochon N, Creff A, et al. <i>J Exp Bot.</i> 2009;60: 2653–2664. doi:10.1093/jxb/erp109                 |



|           |                                           |                                                                                                                                              |
|-----------|-------------------------------------------|----------------------------------------------------------------------------------------------------------------------------------------------|
| AT5G04410 | NAC DOMAIN CONTAINING PROTEIN 2 (NAC2)    | Nguyen HM, Schippers JHM, Gõni-Ramos O, Christoph MP, Dortay H, Van Der Hoorn RAL, et al. <i>Plant J.</i> 2013;74: 25. doi:10.1111/tpj.12097 |
| AT5G05690 | CONSTITUTIVE PHOTOMORPHOGENIC DWARF (CPD) | Zhiponova MK, Vanhoutte I, Boudolf V, Betti C, Dhondt S, Coppens F, et al. <i>New Phytol.</i> 2013;197: 490. doi:10.1111/nph.12036           |
| AT5G08790 | ATAF2                                     | Peng H, Zhao J, Neff MM. <i>Development.</i> 2015; 4129. doi:10.1242/dev.124347                                                              |
| AT5G09810 | ACTIN 7 (ACT7)                            | Mei Y, Gao H-B, Yuan M, Xue H-W. <i>Plant Cell.</i> 2012;24: 1066. doi:10.1105/tpc.111.095059                                                |
| AT5G15470 | GALACTURONOSYLTRANSFERASE 14 (GAUT14)     | Wang L, Wang W, Wang Y-Q, Liu Y, Wang J, Zhang X, et al. <i>Mol Plant.</i> 2013;6: 1131. doi:10.1093/mp/sst084                               |
| AT5G17300 | REVEILLE 1 (RVE1)                         | Xu G, Guo H, Zhang D, Chen D, Jiang Z, Lin R. <i>Photosynth Res.</i> 2015;126: 331–340. doi:10.1007/s11120-015-0146-5                        |
| AT5G17490 | RGA-LIKE PROTEIN 3 (RGL3)                 | Achard P, Renou J-P, Berthomé R, Harberd NP, Genschik P. <i>Curr Biol.</i> 2008;18: 656. doi:10.1016/j.cub.2008.04.034                       |
| AT5G23670 | LONG CHAIN BASE2 (LCB2)                   | Teng C, Dong H, Shi L, Deng Y, Mu J, Zhang J, et al. <i>Plant Physiol.</i> 2008;146: 1322. doi:10.1104/pp.107.113506                         |
| AT5G28540 | BIP1                                      | Maruyama D, Endo T, Nishikawa S. <i>Proc Natl Acad Sci.</i> 2010;107: 1689. doi:10.1073/pnas.0905795107                                      |
| AT5G42020 | BIP2                                      | Maruyama D, Endo T, Nishikawa S. <i>Proc Natl Acad Sci.</i> 2010;107: 1689. doi:10.1073/pnas.0905795107                                      |
| AT5G46700 | TORNADO 2 (TRN2)                          | Cnops G, Neyt P, Raes J, Petrarulo M, Nelissen H, Malenica N, et al. <i>Plant Cell.</i> 2006;18: 852. doi:10.1105/tpc.105.040568             |
| AT5G48030 | GAMETOPHYTIC FACTOR 2 (GFA2)              | Christensen C, Subramanian S, Drews GN. <i>Dev Biol.</i> 1998;202: 136. doi:10.1006/dbio.1998.8980                                           |
| AT5G53400 | BOBBER1 (BOB1)                            | Kaplinsky NJ. <i>Plant Signal Behav.</i> 2009;4: 1157. doi:10.1104/pp.109.142125                                                             |

|                           |                                              |                                                                                                                                                 |
|---------------------------|----------------------------------------------|-------------------------------------------------------------------------------------------------------------------------------------------------|
| <b>AT5G54510</b>          | <b>DWARF IN LIGHT 1 (DFL1)</b>               | Nakazawa M, Yabe N, Ichikawa T, Yamamoto YY, Yoshizumi T, Hasunuma K, et al. <i>Plant J.</i> 2001;25: 213. doi:10.1046/j.1365-313X.2001.00957.x |
| AT5G55920                 | OLIGOCELLULA 2 (OLI2)                        | Fujikura U, Horiguchi G, Ponce MR, Micol JL, Tsukaya H. <i>Plant J.</i> 2009;59: 499. doi:10.1111/j.1365-313X.2009.03886.x                      |
| <b>AT5G56600</b>          | <b>PROFILIN 3 (PRF3)</b>                     | Fan T, Zhai H, Shi W, Wang J, Jia H, Xiang Y, et al. <i>Plant Cell Rep.</i> 2013;32: 149. doi:10.1007/s00299-012-1349-2                         |
| <b>AT5G62020</b>          | <b>HSFB2a</b>                                | Wunderlich M, Groß-Hardt R, Schöffl F. <i>Plant Mol Biol.</i> 2014;85: 541. doi:10.1007/s11103-014-0202-0                                       |
| <b>AT5G62090</b>          | <b>SEUSS-LIKE 2 (SLK2)</b>                   | Bao F, Azhakanandam S, Franks RG. <i>Plant Physiol.</i> 2010;152: 836. doi:10.1104/pp.109.146183                                                |
| AT5G62430                 | CYCLING DOF FACTOR 1 (CDF1)                  | Song YH, Smith RW, To BJ, Millar AJ, Imaizumi T. <i>Science (80- )</i> . 2012;336: 1045. doi:10.1126/science.1219644                            |
| <b>AT5G64510</b>          | <b>TUNICAMYCIN INDUCED 1 (TIN1)</b>          | Iwata Y, Nishino T, Iwano M, Takayama S, Koizumi N. <i>Plant Biotechnol.</i> 2012;29: 51. doi:10.5511/plantbiotechnology.11.1228a               |
| AT5G67420                 | LOB DOMAIN-CONTAINING PROTEIN 37 (LBD37)     | Shuai, B, Reynaga-Pena, CG, Springer P. <i>Plant Physiol.</i> 2002;129: 747. doi:10.1104/pp.010926                                              |
| <a href="#">AT1G04400</a> | <a href="#">CRYPTOCHROME 2 (CRY2)</a>        | Pedmale U V., Huang SSC, Zander M, Cole BJ, Hetzel J, Ljung K, et al. <i>Cell</i> 2016;164: 233. doi:10.1016/j.cell.2015.12.018                 |
| <a href="#">AT1G10470</a> | <a href="#">RESPONSE REGULATOR 4 (ARR4)</a>  | Verma V, Sivaraman J, Srivastava AK, Sadanandom A, Kumar PP. <i>New Phytol.</i> 2015;206: 726. doi:10.1111/nph.13297                            |
| <a href="#">AT1G11130</a> | <a href="#">STRUBBELIG (SUB)</a>             | Kwak S-HH, Woo S, Lee MM, Schiefelbein J. <i>Plant Physiol.</i> 2014;166: 987. doi:10.1104/pp.114.247288                                        |
| <a href="#">AT1G14000</a> | <a href="#">VH1-INTERACTING KINASE (VIK)</a> | Ceserani T, Trofka A, Gandotra N, Nelson T. <i>Plant J.</i> 2009;57: 1000. doi:10.1111/j.1365-313X.2008.03742.x                                 |

|           |                                          |                                                                                                                                                |
|-----------|------------------------------------------|------------------------------------------------------------------------------------------------------------------------------------------------|
| AT1G18040 | CYCLIN-DEPENDENT KINASE D1;3 (CDKD1;3)   | Takatsuka H, Umeda-Hara C, Umeda M. Plant J. 2015;82: 1004. doi:10.1111/tpj.12872                                                              |
| AT1G35580 | CYTOSOLIC INVERTASE 1 (CINV1)            | Barratt DHP, Derbyshire P, Findlay K, Pike M, Wellner N, Lunn J, et al. Proc Natl Acad Sci U S A. 2009;106: 13124. doi:10.1073/pnas.0900689106 |
| AT1G66740 | SGA2                                     | Lario L, Ramirez-Parra E, Gutierrez C, Spampinato C, Casati P. Plant Physiol. 2013;162: 1164. doi:10.1104/pp.112.212837                        |
| AT1G71040 | LOW PHOSPHATE ROOT2 (LPR2)               | Ticconi CA, Lucero RD, Sakhonwasee S, Adamson AW, Creff A, Nussaume L, et al. Proc Natl Acad Sci. 2009;106: 14174. doi:10.1073/pnas.0901778106 |
| AT1G72440 | EMBRYO SAC DEVELOPMENT ARREST 25 (EDA25) | Li N, Yuan L, Liu N, Shi D, Li X, Tang Z, et al. Plant Physiol. 2009;151: 1486. doi:10.1104/pp.109.142414                                      |
| AT1G80080 | TOO MANY MOUTHS (TMM)                    | Geisler M, Yang M, Sack FD. Planta. 1998;205: 522. doi:10.1007/s004250050351                                                                   |
| AT2G01420 | PIN-FORMED 4 (PIN4)                      | Friml J, Benková E, Blilou I, Wisniewska J, Hamann T, Ljung K, et al. Cell. 2002;108: 661. doi:10.1016/S0092-8674(02)00656-6                   |
| AT2G14210 | AGAMOUS-LIKE 44 (AGL44)                  | Gan Y, Bernreiter A, Filleur S, Abram B, Forde BG. Plant Cell Physiol. 2012;53: 1003. doi:10.1093/pcp/pcs050                                   |
| AT2G24840 | AGAMOUS-LIKE 61 (AGL61)                  | Steffen JG, Kang I-H, Portereiko MF, Lloyd A, Drews GN. Plant Physiol. 2008;148: 258. doi:10.1104/pp.108.119404                                |
| AT2G28056 | MICRORNA172A (MIR172A)                   | Huo H, Wei S, Bradford KJ. Proc Natl Acad Sci. 2016;1: 1. doi:10.1073/pnas.1600558113                                                          |
| AT2G28550 | RELATED TO AP2.7 (RAP2.7)                | Zhang B, Wang L, Zeng L, Zhang C, Ma H. Genes Dev. 2015;29: 975. doi:10.1101/gad.251520.114.                                                   |
| AT2G38120 | AUXIN RESISTANT 1 (AUX1)                 | Kakani A, Li G, Peng Z. Planta. 2009;229: 645. doi:10.1007/s00425-008-0846-6                                                                   |
| AT2G39705 | ROTUNDIFOLIA LIKE 8 (RTFL8)              | Wen J, Lease KA, Walker JC. Plant J. 2004;37: 668. doi:10.1111/j.1365-313X.2003.01994.x                                                        |

|           |                                                        |                                                                                                                                        |
|-----------|--------------------------------------------------------|----------------------------------------------------------------------------------------------------------------------------------------|
| AT2G39990 | EUKARYOTIC TRANSLATION INITIATION FACTOR 2 (EIF2)      | Xia C, Wang Y, Li W, Chen Y-R, Deng Y, Zhang X, et al. <i>Plant J.</i> 2010;63: 189. doi:10.1111/j.1365-313X.2010.04237.x              |
| AT2G44810 | DEFECTIVE ANther DEHISCENCE 1 (DAD1)                   | Kim SG, Lee S, Kim YS, Yun DJ, Woo JC, Park CM. <i>Plant Mol Biol.</i> 2010;74: 337. doi:10.1007/s11103-010-9677-5                     |
| AT2G45660 | AGAMOUS-LIKE 20 (AGL20)                                | Richter R, Bastakis E, Schwechheimer C. <i>Plant Physiol.</i> 2013;162: 1992. doi:10.1104/pp.113.219238                                |
| AT2G46410 | CAPRICE (CPC)                                          | Tominaga-Wada R, Wada T. <i>J Plant Physiol.</i> 2016;199: 111. doi:10.1016/j.jplph.2016.05.014                                        |
| AT3G07780 | OBERON1 (OBE1)                                         | Saiga S, Furumizu C, Yokoyama R, Kurata T, Sato S, Kato T, et al. <i>Development.</i> 2008;135: 1751. doi:10.1242/dev.014993           |
| AT3G22380 | TIME FOR COFFEE (TIC)                                  | Hong LW, Yan DW, Liu WC, Chen HG, Lu YT. <i>J Exp Bot.</i> 2014;65: 275. doi:10.1093/jxb/ert374                                        |
| AT3G48360 | BTB AND TAZ DOMAIN PROTEIN 2 (bt2)                     | Robert HS, Quint A, Brand D, Vivian-Smith A, Offringa R. <i>Plant J.</i> 2009;58: 109. doi:10.1111/j.1365-313X.2008.03764.x            |
| AT3G54340 | APETALA 3 (AP3)                                        | Jack T, Fox GL, Meyerowitz EM. <i>Cell.</i> 1994;76: 703. doi:10.1016/0092-8674(94)90509-6                                             |
| AT3G63190 | RIBOSOME RECYCLING FACTOR, CHLOROPLAST PRECURSOR (RRF) | Wang L, Ouyang M, Li Q, Zou M, Guo J, Ma J, et al. <i>Plant Mol Biol.</i> 2010;74: 47. doi:10.1007/s11103-010-9653-0                   |
| AT4G01370 | MAP KINASE 4 (MPK4)                                    | Gawronski P, Witon D, Vashutina K, Bederska M, Betlinski B, Rusaczek A, et al. <i>Mol Plant.</i> 2014;7: 1151. doi:10.1093/mp/ssu060   |
| AT4G15560 | CLOROPLASTOS ALTERADOS 1 (CLA1)                        | Mandel MA, Feldmann K a, Herrera-Estrella L, Rocha-Sosa M, Leon P. <i>Plant J.</i> 1996;9: 649. doi:10.1046/j.1365-313X.1996.9050649.x |
| AT4G25350 | SHORT HYPOCOTYL UNDER BLUE1 (SHB1)                     | Zhou Y, Ni M. <i>Dev Biol.</i> 2009;331: 50. doi:10.1016/j.ydbio.2009.04.023198.                                                       |
| AT4G25640 | DETOXIFYING EFFLUX CARRIER 35 (DTX35)                  | Thompson EP, Wilkins C, Demidchik V, Davies JM, Glover BJ. <i>J Exp Bot.</i> 2010;61: 439. doi:10.1093/jxb/erp312                      |

|           |                                                                  |                                                                                                                                        |
|-----------|------------------------------------------------------------------|----------------------------------------------------------------------------------------------------------------------------------------|
| AT4G26690 | SHAVEN 3 (SHV3)                                                  | Yeats TH, Sorek H, Wemmer DE, Somerville CR. Plant Physiol. 2016;171: 110. doi:10.1104/pp.16.00302                                     |
| AT4G30960 | SOS3-INTERACTING PROTEIN 3 (SIP3)                                | Tripathi V, Parasuraman B, Laxmi A, Chattopadhyay D. Plant J. 2009;58: 778. doi:10.1111/j.1365-313X.2009.03812.x                       |
| AT4G34160 | CYCLIN D3;1 (CYCD3;1)                                            | Randall RS, Sornay E, Dewitte W, Murray JAH. J Exp Bot. 2015;66: 3991. doi:10.1093/jxb/erv200                                          |
| AT4G38430 | RHO GUANYL-NUCLEOTIDE EXCHANGE FACTOR 1 (ROPGEF1)                | Liu Y, Dong, Q, Kita, D, Huang, J-B, Liu, G, Wu, X, Zhu, X, Cheung, AY, Wu, H-M, Tao L-Z. Plant Physiol. 2017; doi:10.1104/pp.17.00697 |
| AT4G39800 | D-MYO-INOSITOL 3-PHOSPHATE SYNTHASE 1 (MIPS1)                    | Chen H, Xiong L. J Biol Chem. 2010;285: 24238. doi:10.1074/jbc.M110.123661                                                             |
| AT5G01240 | LIKE AUXIN RESISTANT 1 (LAX1)                                    | Kasprzewska A, Carter R, Swarup R, Bennett M, Monk N, Hobbs JK, et al. Plant J. 2015;83: 705. doi:10.1111/tpj.12921                    |
| AT5G01270 | CARBOXYL-TERMINAL DOMAIN (CTD) PHOSPHATASE-LIKE 2 (CPL2)         | Ueda A, Li P, Feng Y, Vikram M, Kim S, Kang CH, et al. Plant Mol Biol. 2008;67: 683. doi:10.1007/s11103-008-9348-y                     |
| AT5G02030 | REPLUMLESS (RPL)                                                 | Bencivenga S, Serrano-Mislata A, Bush M, Fox S, Sablowski R. Dev Cell. 2016;39: 198. doi:10.1016/j.devcel.2016.08.013                  |
| AT5G07290 | MEI2-LIKE 4 (ML4)                                                | Kaur J, Sebastian J, Siddiqi I. Plant Cell. 2006;18: 545. doi:10.1105/tpc.105.039156.1                                                 |
| AT5G09970 | CYTOCHROME P450, FAMILY 78, SUBFAMILY A, POLYPEPTIDE 7 (CYP78A7) | Eriksson S, Stransfeld L, Adamski NM, Breuninger H, Lenhard M. Curr Biol. 2010;20: 527. doi:10.1016/j.cub.2010.01.039                  |
| AT5G24860 | FLOWERING PROMOTING FACTOR 1 (FPF1)                              | Kania T, Russenberger D, Peng S, Apel K, Melzer S. Plant Cell. 1997;9: 1327. doi:10.1105/tpc.9.8.1327                                  |
| AT5G41990 | WITH NO LYSINE (K) KINASE 8 (WNK8)                               | Wang, Y, Liu, K, Liao, H, Zhuang, C., Yan X. Plant Biol. 2008; 8. doi:10.1111/j.1438-8677.2008.00072.x                                 |
| AT5G51760 | ABA-HYPERSENSITIVE GERMINATION 1 (AHG1)                          | Née G, Kramer K, Nakabayashi K, Yuan B, Xiang Y, Miatton E, et al. Nat Commun. 2017;8: 72. doi:10.1038/s41467-017-00113-6              |

|           |                                |                                                                                                               |
|-----------|--------------------------------|---------------------------------------------------------------------------------------------------------------|
| AT5G61960 | MEI2-LIKE PROTEIN 1 (ML1)      | Kaur J, Sebastian J, Siddiqi I. Plant Cell. 2006;18: 545. doi:10.1105/tpc.105.039156.1                        |
| AT5G62000 | AUXIN RESPONSE FACTOR 2 (ARF2) | Schruff M, Spielman M, Tiwari S, Adams S, Fenby N, Scott R. Development. 2006;133: 251. doi:10.1242/dev.02194 |

**Table S2** Primers used in the qPCR analyses.

| Primer Name | Sequence (5' to 3')       |
|-------------|---------------------------|
| CDF1_F      | CAACGTAAACCAACCTCGCC      |
| CDF1_R      | CACTTCTCATGGTCCCACCT      |
| MYB16_F     | AGGAAACAGATGGTCAGCGA      |
| MYB16_R     | CACTAACCGTTTCTTCAAATGAGTG |
| LZF1_F      | AGGAGATTTTCGGGCTAACCG     |
| LZF1_R      | GTTTCATCTTGAGAACGTCTGTCT  |
| NAT_LZF1_F  | GGATTAGAGAGGCCATAAACCCAG  |
| NAT_LZF1_R  | CCAGATGCTTCCTGTACACAC     |
| NAT_MYB16_F | CATTGCCTGAGAAAGCTGGT      |
| NAT_MYB16_R | CATCGATGGAGACCTGAGAAGAG   |
| NAT_CDF1_F  | CGCTCACCTTTATTGGTTTCAGT   |
| NAT_CDF1_R  | GTTGGTGAACCAGAGGTTGC      |
| HSFB2a_F    | CGATGGGAGTTTTCAAACGA      |
| HSFB2a_R    | ACAACCATCGTCTGGTTTCG      |
| HSFB2b_F    | GGGGTTTCTATTGGGGTCAA      |
| HSFB2b_R    | CCATTGGCTCTGCCTTAACA      |
| SZF1_F      | TGTTGCTGGCTGTTCTGTGA      |
| SZF1_R      | GCTTTCCTCCTCGGACTAGC      |
| GBF3_F      | ATGACGTGGTCATCGTCTTG      |
| GBF3_R      | CCAGAGCGAAAAAGAGTTCAG     |
| bZIP28_F    | ACGACCAAGTTCGTTGAGCA      |
| bZIP28_R    | AAACCCCTTGCTTTCTCGCT      |
| RVE1_F      | ATGCACCCAAGGTACGGAAG      |
| RVE1_R      | TATTCGTCTCCAAGCTCGCC      |
| RVE7_F      | CGCGGAAGAATCTCACAACCCAT   |
| RVE7_R      | GCATCCCTGAGTAGTGATTCTCC   |
